# Supplementary material for: Identification of Differentially Expressed microRNAs between the Fenpropathrin Resistant and Susceptible Strains in Tetranychus cinnabarinus
Source: PLoS One. 2016 Apr 6;11(4):e0152924. doi: 10.1371/journal.pone.0152924 (PMC4822788; doi:10.1371/journal.pone.0152924)
Supplement: S7 Table — (XLSX) [file pone.0152924.s009.xlsx]

## Sheet: Sheet1
S7 Table. The miRNA-target pairs collectively predicted by more than 2 algorithms
	MiRNA	Target	the number of algorithms
	tci-miR-210-3p	tetur10g02710	6
	Novel_2	tetur10g03510	5
	Novel_26	tetur10g01700	5
	Novel_33	tetur10g00480	5
	Novel_41	tetur10g01310	5
	Novel_52	tetur13g04500	5
	Novel_6	tetur10g03360	5
	Novel_66	tetur109g00020	5
	tci-miR-133-5p	tetur10g04840	5
	tci-miR-133-5p	tetur10g00640	5
	tci-miR-133-5p	tetur11g03970	5
	tci-miR-133-5p	tetur10g01500	5
	tci-miR-133-5p	tetur10g05080	5
	tci-miR-133-5p	tetur28g00580	5
	tci-miR-133-5p	tetur16g02260	5
	tci-miR-184-3p	tetur10g00640	5
	tci-miR-190-5p	tetur10g04690	5
	tci-miR-210-3p	tetur10g00080	5
	tci-miR-263a-3p	tetur13g00790	5
	tci-miR-263a-3p	tetur10g00710	5
	tci-miR-263b-3p	tetur10g00770	5
	tci-miR-263b-3p	tetur10g02590	5
	tci-miR-263b-3p	tetur14g03680	5
	tci-miR-263b-3p	tetur10g04570	5
	tci-miR-263b-5p	tetur13g04696	5
	tci-miR-278-3p	tetur10g02590	5
	tci-miR-278-5p	tetur10g02700	5
	tci-miR-279-5p	tetur10g02560	5
	tci-miR-281-3p	tetur14g03680	5
	tci-miR-281-3p	tetur10g01690	5
	tci-miR-305-5p	tetur10g02950	5
	tci-miR-307-3p	tetur18g00420	5
	tci-miR-317-3p	tetur10g04280	5
	tci-miR-34-5p	tetur15g01670	5
	tci-miR-34-5p	tetur10g04540	5
	tci-miR-5728-3p	tetur14g00650	5
	tci-miR-5735-3p	tetur10g02710	5
	tci-miR-71-5p	tetur14g01790	5
	Novel_1	tetur10g01350	4
	Novel_10	tetur10g04600	4
	Novel_10	tetur10g01080	4
	Novel_10	tetur10g00680	4
	Novel_10	tetur10g01100	4
	Novel_10	tetur10g01300	4
	Novel_10	tetur10g01500	4
	Novel_10	tetur10g02150	4
	Novel_11	tetur10g01980	4
	Novel_13	tetur10g02590	4
	Novel_13	tetur10g01300	4
	Novel_13	tetur10g04030	4
	Novel_13	tetur10g04840	4
	Novel_13	tetur13g01740	4
	Novel_13	tetur10g00680	4
	Novel_13	tetur10g02510	4
	Novel_13	tetur10g02750	4
	Novel_13	tetur11g03450	4
	Novel_14	tetur10g02590	4
	Novel_14	tetur10g01040	4
	Novel_14	tetur10g00370	4
	Novel_14	tetur13g02870	4
	Novel_17	tetur10g03520	4
	Novel_17	tetur10g04470	4
	Novel_17	tetur26g01280	4
	Novel_17	tetur06g00530	4
	Novel_17	tetur10g04690	4
	Novel_17	tetur14g03020	4
	Novel_18	tetur10g00480	4
	Novel_2	tetur10g01050	4
	Novel_2	tetur10g04500	4
	Novel_2	tetur10g01340	4
	Novel_2	tetur10g04840	4
	Novel_2	tetur10g01150	4
	Novel_2	tetur10g00260	4
	Novel_2	tetur10g00640	4
	Novel_2	tetur10g02170	4
	Novel_2	tetur10g04010	4
	Novel_2	tetur10g04730	4
	Novel_2	tetur05g01240	4
	Novel_21	tetur10g01350	4
	Novel_25	tetur10g04010	4
	Novel_26	tetur10g00640	4
	Novel_26	tetur10g01150	4
	Novel_26	tetur10g04470	4
	Novel_26	tetur10g00370	4
	Novel_26	tetur10g02710	4
	Novel_26	tetur10g01050	4
	Novel_26	tetur10g00270	4
	Novel_26	tetur10g02590	4
	Novel_26	tetur10g02350	4
	Novel_26	tetur10g04260	4
	Novel_26	tetur10g04500	4
	Novel_26	tetur10g01340	4
	Novel_26	tetur10g02170	4
	Novel_26	tetur10g00400	4
	Novel_26	tetur10g05794	4
	Novel_26	tetur10g04720	4
	Novel_26	tetur36g00850	4
	Novel_26	tetur13g00320	4
	Novel_29	tetur10g04560	4
	Novel_29	tetur10g00260	4
	Novel_30	tetur10g01350	4
	Novel_30	tetur10g02320	4
	Novel_30	tetur10g04180	4
	Novel_33	tetur14g01610	4
	Novel_33	tetur11g03940	4
	Novel_33	tetur10g05100	4
	Novel_34	tetur10g02350	4
	Novel_34	tetur10g01040	4
	Novel_35	tetur10g00030	4
	Novel_43	tetur11g03300	4
	Novel_44	tetur10g04040	4
	Novel_44	tetur10g05580	4
	Novel_44	tetur10g00710	4
	Novel_44	tetur10g02010	4
	Novel_44	tetur11g04570	4
	Novel_46	tetur13g03200	4
	Novel_47	tetur10g05080	4
	Novel_49	tetur10g02350	4
	Novel_49	tetur10g01290	4
	Novel_49	tetur10g04120	4
	Novel_49	tetur10g04560	4
	Novel_49	tetur10g01300	4
	Novel_49	tetur14g01560	4
	Novel_49	tetur10g00150	4
	Novel_5	tetur10g01270	4
	Novel_52	tetur10g00260	4
	Novel_52	tetur10g03910	4
	Novel_52	tetur10g00370	4
	Novel_52	tetur10g00640	4
	Novel_52	tetur11g01310	4
	Novel_52	tetur10g02350	4
	Novel_52	tetur10g04470	4
	Novel_52	tetur10g04500	4
	Novel_52	tetur10g00040	4
	Novel_52	tetur02g08480	4
	Novel_52	tetur101g00020	4
	Novel_52	tetur10g00270	4
	Novel_52	tetur10g00870	4
	Novel_53	tetur11g06180	4
	Novel_54	tetur109g00010	4
	Novel_56	tetur10g01690	4
	Novel_56	tetur10g00370	4
	Novel_58	tetur10g00640	4
	Novel_61	tetur10g03530	4
	Novel_63	tetur10g02750	4
	Novel_63	tetur10g01690	4
	Novel_63	tetur10g02810	4
	Novel_65	tetur10g04910	4
	Novel_67	tetur10g01040	4
	Novel_67	tetur10g01300	4
	Novel_67	tetur10g04730	4
	Novel_67	tetur10g02310	4
	Novel_67	tetur10g00240	4
	Novel_67	tetur11g00630	4
	Novel_67	tetur10g04990	4
	Novel_67	tetur11g01830	4
	Novel_67	tetur14g01340	4
	Novel_67	tetur10g02800	4
	Novel_69	tetur14g03680	4
	Novel_7	tetur10g00640	4
	Novel_7	tetur10g01390	4
	Novel_70	tetur10g02540	4
	Novel_8	tetur10g04260	4
	Novel_9	tetur14g03540	4
	tci-miR-10-3p	tetur10g00800	4
	tci-miR-124-1-5p	tetur14g01950	4
	tci-miR-124-2-5p	tetur15g04107	4
	tci-miR-124-2-5p	tetur10g00370	4
	tci-miR-124-2-5p	tetur14g03680	4
	tci-miR-124-2-5p	tetur10g00150	4
	tci-miR-124-2-5p	tetur26g00250	4
	tci-miR-124-2-5p	tetur11g01610	4
	tci-miR-124-3p	tetur10g05410	4
	tci-miR-124-3p	tetur12g00650	4
	tci-miR-124-3p	tetur10g02750	4
	tci-miR-124-3p	tetur10g02470	4
	tci-miR-124-3p	tetur11g00600	4
	tci-miR-124-3p	tetur10g04630	4
	tci-miR-12a-5p	tetur22g02600	4
	tci-miR-12b-5p	tetur22g02600	4
	tci-miR-12b-5p	tetur13g01370	4
	tci-miR-133-5p	tetur10g00270	4
	tci-miR-133-5p	tetur13g02710	4
	tci-miR-133-5p	tetur10g00260	4
	tci-miR-133-5p	tetur14g03680	4
	tci-miR-133-5p	tetur13g03020	4
	tci-miR-133-5p	tetur11g02400	4
	tci-miR-133-5p	tetur11g00500	4
	tci-miR-133-5p	tetur11g02130	4
	tci-miR-133-5p	tetur10g05160	4
	tci-miR-133-5p	tetur11g04380	4
	tci-miR-133-5p	tetur11g00260	4
	tci-miR-133-5p	tetur10g00370	4
	tci-miR-133-5p	tetur25g00660	4
	tci-miR-133-5p	tetur06g01410	4
	tci-miR-133-5p	tetur15g00740	4
	tci-miR-133-5p	tetur10g01150	4
	tci-miR-133-5p	tetur11g03200	4
	tci-miR-133-5p	tetur10g04180	4
	tci-miR-133-5p	tetur13g03170	4
	tci-miR-133-5p	tetur10g00710	4
	tci-miR-133-5p	tetur14g03260	4
	tci-miR-133-5p	tetur10g01100	4
	tci-miR-133-5p	tetur11g04650	4
	tci-miR-133-5p	tetur10g05230	4
	tci-miR-133-5p	tetur13g03520	4
	tci-miR-133-5p	tetur19g01440	4
	tci-miR-133-5p	tetur17g03560	4
	tci-miR-133-5p	tetur14g02500	4
	tci-miR-1-3p	tetur10g00480	4
	tci-miR-1-3p	tetur101g00030	4
	tci-miR-1-3p	tetur10g04840	4
	tci-miR-1-3p	tetur10g01690	4
	tci-miR-1-3p	tetur13g00760	4
	tci-miR-1-3p	tetur10g04400	4
	tci-miR-1-3p	tetur10g03930	4
	tci-miR-184-3p	tetur10g00370	4
	tci-miR-184-3p	tetur10g02010	4
	tci-miR-184-3p	tetur11g00260	4
	tci-miR-184-3p	tetur10g02170	4
	tci-miR-184-3p	tetur10g02350	4
	tci-miR-184-3p	tetur10g01050	4
	tci-miR-184-3p	tetur11g06170	4
	tci-miR-184-3p	tetur10g01350	4
	tci-miR-184-3p	tetur139g00030	4
	tci-miR-184-3p	tetur10g04500	4
	tci-miR-184-3p	tetur10g01340	4
	tci-miR-184-3p	tetur11g03730	4
	tci-miR-184-3p	tetur11g01750	4
	tci-miR-184-5p	tetur10g00560	4
	tci-miR-184-5p	tetur12g00760	4
	tci-miR-190-3p	tetur10g02350	4
	tci-miR-190-3p	tetur10g03070	4
	tci-miR-190-5p	tetur10g02420	4
	tci-miR-190-5p	tetur11g03920	4
	tci-miR-190-5p	tetur10g00270	4
	tci-miR-190-5p	tetur10g04040	4
	tci-miR-190-5p	tetur19g00630	4
	tci-miR-190-5p	tetur13g00510	4
	tci-miR-210-3p	tetur10g00370	4
	tci-miR-210-3p	tetur01g03860	4
	tci-miR-210-3p	tetur14g03700	4
	tci-miR-210-3p	tetur10g00400	4
	tci-miR-210-3p	tetur11g02460	4
	tci-miR-210-3p	tetur16g04076	4
	tci-miR-210-3p	tetur18g03130	4
	tci-miR-210-5p	tetur10g01190	4
	tci-miR-210-5p	tetur14g01550	4
	tci-miR-2-3p	tetur10g01340	4
	tci-miR-2-3p	tetur11g03400	4
	tci-miR-2-3p	tetur12g00690	4
	tci-miR-252-3p	tetur14g01740	4
	tci-miR-252-3p	tetur26g01280	4
	tci-miR-252-5p	tetur11g00590	4
	tci-miR-2-5p	tetur13g01310	4
	tci-miR-2-5p	tetur10g00480	4
	tci-miR-2-5p	tetur10g00050	4
	tci-miR-2-5p	tetur14g01610	4
	tci-miR-263a-3p	tetur15g00900	4
	tci-miR-263a-3p	tetur13g03520	4
	tci-miR-263a-3p	tetur13g00160	4
	tci-miR-263a-3p	tetur11g03170	4
	tci-miR-263a-3p	tetur10g05080	4
	tci-miR-263a-5p	tetur13g00760	4
	tci-miR-263a-5p	tetur11g02130	4
	tci-miR-263a-5p	tetur10g03890	4
	tci-miR-263a-5p	tetur10g04380	4
	tci-miR-263a-5p	tetur13g02810	4
	tci-miR-263b-3p	tetur13g00370	4
	tci-miR-263b-3p	tetur13g01210	4
	tci-miR-263b-3p	tetur13g00160	4
	tci-miR-263b-3p	tetur10g02320	4
	tci-miR-263b-3p	tetur10g04560	4
	tci-miR-263b-3p	tetur10g00370	4
	tci-miR-263b-3p	tetur10g00240	4
	tci-miR-263b-3p	tetur10g00080	4
	tci-miR-263b-3p	tetur13g03950	4
	tci-miR-263b-3p	tetur10g02580	4
	tci-miR-263b-3p	tetur11g01470	4
	tci-miR-263b-3p	tetur13g02520	4
	tci-miR-263b-3p	tetur18g02550	4
	tci-miR-263b-3p	tetur10g01700	4
	tci-miR-263b-3p	tetur10g03400	4
	tci-miR-263b-3p	tetur11g04710	4
	tci-miR-263b-3p	tetur24g01980	4
	tci-miR-263b-5p	tetur11g03340	4
	tci-miR-263b-5p	tetur10g00490	4
	tci-miR-276-3p	tetur22g02800	4
	tci-miR-278-3p	tetur10g04840	4
	tci-miR-279-3p	tetur23g02080	4
	tci-miR-279-5p	tetur10g02170	4
	tci-miR-279-5p	tetur33g00340	4
	tci-miR-281-3p	tetur10g04470	4
	tci-miR-281-3p	tetur10g01080	4
	tci-miR-281-3p	tetur10g00160	4
	tci-miR-281-3p	tetur10g01980	4
	tci-miR-281-3p	tetur15g01450	4
	tci-miR-281-3p	tetur02g11620	4
	tci-miR-281-5p	tetur10g01310	4
	tci-miR-281-5p	tetur10g04120	4
	tci-miR-281-5p	tetur10g00800	4
	tci-miR-281-5p	tetur10g01050	4
	tci-miR-305-3p	tetur14g01380	4
	tci-miR-305-3p	tetur01g09290	4
	tci-miR-305-5p	tetur13g03630	4
	tci-miR-305-5p	tetur15g00120	4
	tci-miR-305-5p	tetur12g02220	4
	tci-miR-305-5p	tetur12g00670	4
	tci-miR-317-3p	tetur10g02590	4
	tci-miR-317-3p	tetur15g00660	4
	tci-miR-317-3p	tetur13g03680	4
	tci-miR-317-3p	tetur10g04690	4
	tci-miR-317-3p	tetur10g01080	4
	tci-miR-317-3p	tetur11g04420	4
	tci-miR-317-3p	tetur120g00030	4
	tci-miR-317-3p	tetur11g05830	4
	tci-miR-317-3p	tetur13g01750	4
	tci-miR-317-5p	tetur10g02590	4
	tci-miR-317-5p	tetur19g00050	4
	tci-miR-317-5p	tetur01g16220	4
	tci-miR-34-5p	tetur14g03680	4
	tci-miR-34-5p	tetur10g01690	4
	tci-miR-34-5p	tetur11g03920	4
	tci-miR-34-5p	tetur19g01980	4
	tci-miR-34-5p	tetur10g04500	4
	tci-miR-34-5p	tetur15g00120	4
	tci-miR-34-5p	tetur10g01500	4
	tci-miR-34-5p	tetur10g04120	4
	tci-miR-34-5p	tetur10g02260	4
	tci-miR-34-5p	tetur117g00010	4
	tci-miR-34-5p	tetur27g01650	4
	tci-miR-34-5p	tetur26g00260	4
	tci-miR-34-5p	tetur10g04260	4
	tci-miR-34-5p	tetur10g02710	4
	tci-miR-34-5p	tetur10g04470	4
	tci-miR-34-5p	tetur20g00110	4
	tci-miR-34-5p	tetur17g00610	4
	tci-miR-34-5p	tetur02g05660	4
	tci-miR-34-5p	tetur14g01640	4
	tci-miR-3931-3p	tetur10g00970	4
	tci-miR-3931-3p	tetur02g12820	4
	tci-miR-3931-3p	tetur10g04600	4
	tci-miR-3931-3p	tetur10g02310	4
	tci-miR-3931-3p	tetur10g04730	4
	tci-miR-5727-3p	tetur14g03260	4
	tci-miR-5728-1-5p	tetur13g03660	4
	tci-miR-5728-1-5p	tetur11g04060	4
	tci-miR-5728-1-5p	tetur01g14530	4
	tci-miR-5729b-3p	tetur11g03980	4
	tci-miR-5731-3p	tetur10g01350	4
	tci-miR-5735-3p	tetur10g02320	4
	tci-miR-5735-3p	tetur10g02380	4
	tci-miR-5735-3p	tetur10g02040	4
	tci-miR-5735-5p	tetur12g00640	4
	tci-miR-5737-3p	tetur10g04500	4
	tci-miR-5737-3p	tetur14g02460	4
	tci-miR-71-5p	tetur10g00270	4
	tci-miR-71-5p	tetur10g00680	4
	tci-miR-71-5p	tetur10g01150	4
	tci-miR-71-5p	tetur10g04730	4
	tci-miR-71-5p	tetur10g01280	4
	tci-miR-71-5p	tetur13g02810	4
	tci-miR-71-5p	tetur112g00010	4
	tci-miR-745-3p	tetur10g01690	4
	tci-miR-745-3p	tetur10g04920	4
	tci-miR-745-5p	tetur10g01270	4
	tci-miR-7-5p	tetur10g00260	4
	tci-miR-7-5p	tetur10g00640	4
	tci-miR-7-5p	tetur10g04180	4
	tci-miR-7-5p	tetur10g02310	4
	tci-miR-7-5p	tetur10g02010	4
	tci-miR-7-5p	tetur10g00370	4
	tci-miR-87-3p	tetur10g01270	4
	tci-miR-87-3p	tetur10g02590	4
	tci-miR-87-3p	tetur10g05400	4
	tci-miR-87-3p	tetur13g04130	4
	tci-miR-92-3p	tetur10g01270	4
	tci-miR-9-5p	tetur10g03520	4
	tci-miR-9-5p	tetur13g00240	4
	tci-miR-993a-3p	tetur14g01440	4
	tci-miR-993b-3p	tetur14g01440	4
	tci-miR-993b-3p	tetur10g00740	4
	Novel_1	tetur01g14130	3
	Novel_1	tetur10g01640	3
	Novel_1	tetur18g02550	3
	Novel_10	tetur10g00370	3
	Novel_10	tetur11g01610	3
	Novel_10	tetur10g00460	3
	Novel_10	tetur10g01580	3
	Novel_10	tetur10g02540	3
	Novel_10	tetur10g03520	3
	Novel_10	tetur10g04840	3
	Novel_10	tetur11g03170	3
	Novel_10	tetur11g03300	3
	Novel_10	tetur11g04470	3
	Novel_10	tetur139g00030	3
	Novel_10	tetur13g01010	3
	Novel_10	tetur13g02710	3
	Novel_10	tetur14g02690	3
	Novel_10	tetur01g12300	3
	Novel_10	tetur01g12360	3
	Novel_10	tetur04g02120	3
	Novel_10	tetur07g03850	3
	Novel_10	tetur07g07440	3
	Novel_10	tetur08g03120	3
	Novel_10	tetur08g06270	3
	Novel_10	tetur10g00260	3
	Novel_10	tetur10g00560	3
	Novel_10	tetur10g00640	3
	Novel_10	tetur10g01340	3
	Novel_10	tetur10g02010	3
	Novel_10	tetur10g02510	3
	Novel_10	tetur10g02690	3
	Novel_10	tetur10g03470	3
	Novel_10	tetur10g04170	3
	Novel_10	tetur10g04300	3
	Novel_10	tetur10g04990	3
	Novel_10	tetur11g00580	3
	Novel_10	tetur11g00680	3
	Novel_10	tetur11g03360	3
	Novel_10	tetur11g03940	3
	Novel_10	tetur11g04280	3
	Novel_10	tetur12g00640	3
	Novel_10	tetur12g00660	3
	Novel_10	tetur13g00150	3
	Novel_10	tetur13g00370	3
	Novel_10	tetur13g00740	3
	Novel_10	tetur13g00760	3
	Novel_10	tetur13g03520	3
	Novel_10	tetur14g01540	3
	Novel_10	tetur14g02670	3
	Novel_10	tetur15g01940	3
	Novel_10	tetur18g02120	3
	Novel_10	tetur19g00050	3
	Novel_10	tetur19g01900	3
	Novel_10	tetur31g01470	3
	Novel_10	tetur33g01390	3
	Novel_10	tetur36g00390	3
	Novel_11	tetur10g01350	3
	Novel_11	tetur13g00640	3
	Novel_11	tetur20g01110	3
	Novel_11	tetur109g00010	3
	Novel_11	tetur12g04060	3
	Novel_11	tetur16g02190	3
	Novel_11	tetur19g00790	3
	Novel_12	tetur11g03830	3
	Novel_12	tetur30g01240	3
	Novel_13	tetur11g04420	3
	Novel_13	tetur07g03850	3
	Novel_13	tetur10g02010	3
	Novel_13	tetur10g02420	3
	Novel_13	tetur13g03170	3
	Novel_13	tetur10g00260	3
	Novel_13	tetur10g03970	3
	Novel_13	tetur10g01080	3
	Novel_13	tetur139g00030	3
	Novel_13	tetur10g01340	3
	Novel_13	tetur11g00150	3
	Novel_13	tetur10g00790	3
	Novel_13	tetur10g02620	3
	Novel_13	tetur10g03080	3
	Novel_13	tetur10g00400	3
	Novel_13	tetur10g01150	3
	Novel_13	tetur10g01170	3
	Novel_13	tetur10g02130	3
	Novel_13	tetur12g01320	3
	Novel_13	tetur14g01650	3
	Novel_13	tetur41g00010	3
	Novel_13	tetur10g01390	3
	Novel_13	tetur02g00300	3
	Novel_13	tetur02g00720	3
	Novel_13	tetur02g04300	3
	Novel_13	tetur04g02550	3
	Novel_13	tetur04g09140	3
	Novel_13	tetur06g06120	3
	Novel_13	tetur09g03250	3
	Novel_13	tetur17g01090	3
	Novel_13	tetur17g02340	3
	Novel_13	tetur19g02140	3
	Novel_13	tetur31g00630	3
	Novel_14	tetur10g01300	3
	Novel_14	tetur10g04840	3
	Novel_14	tetur10g01080	3
	Novel_14	tetur10g02000	3
	Novel_14	tetur10g04120	3
	Novel_14	tetur13g00700	3
	Novel_14	tetur11g05500	3
	Novel_14	tetur11g02170	3
	Novel_14	tetur02g05960	3
	Novel_14	tetur10g04560	3
	Novel_14	tetur03g05440	3
	Novel_14	tetur02g04980	3
	Novel_14	tetur10g01190	3
	Novel_14	tetur30g00390	3
	Novel_14	tetur08g02130	3
	Novel_14	tetur13g03800	3
	Novel_14	tetur13g04020	3
	Novel_14	tetur25g00920	3
	Novel_17	tetur10g00370	3
	Novel_17	tetur10g04560	3
	Novel_17	tetur10g01350	3
	Novel_17	tetur14g03680	3
	Novel_17	tetur10g02350	3
	Novel_17	tetur10g05834	3
	Novel_17	tetur10g02010	3
	Novel_17	tetur13g02710	3
	Novel_17	tetur13g03660	3
	Novel_17	tetur14g03260	3
	Novel_17	tetur07g03400	3
	Novel_17	tetur38g00120	3
	Novel_17	tetur15g01480	3
	Novel_17	tetur10g04030	3
	Novel_17	tetur10g01340	3
	Novel_17	tetur36g00390	3
	Novel_17	tetur12g00640	3
	Novel_17	tetur11g00430	3
	Novel_17	tetur10g00560	3
	Novel_17	tetur14g01740	3
	Novel_17	tetur15g01690	3
	Novel_17	tetur14g02680	3
	Novel_17	tetur34g00040	3
	Novel_17	tetur02g13150	3
	Novel_17	tetur03g08300	3
	Novel_17	tetur04g00170	3
	Novel_17	tetur14g03540	3
	Novel_17	tetur17g02650	3
	Novel_17	tetur19g00450	3
	Novel_17	tetur31g00340	3
	Novel_18	tetur14g01030	3
	Novel_18	tetur10g01960	3
	Novel_18	tetur12g00270	3
	Novel_18	tetur10g03360	3
	Novel_18	tetur01g03580	3
	Novel_18	tetur02g00700	3
	Novel_2	tetur10g04050	3
	Novel_2	tetur10g01690	3
	Novel_2	tetur11g04380	3
	Novel_2	tetur10g02600	3
	Novel_2	tetur10g00370	3
	Novel_2	tetur10g01080	3
	Novel_2	tetur13g03020	3
	Novel_2	tetur11g04280	3
	Novel_2	tetur10g04220	3
	Novel_2	tetur11g03080	3
	Novel_2	tetur10g00270	3
	Novel_2	tetur13g00150	3
	Novel_2	tetur11g04760	3
	Novel_2	tetur13g03680	3
	Novel_2	tetur10g04410	3
	Novel_2	tetur11g00320	3
	Novel_2	tetur09g01220	3
	Novel_2	tetur15g01750	3
	Novel_2	tetur10g00290	3
	Novel_2	tetur14g03020	3
	Novel_2	tetur10g02350	3
	Novel_2	tetur10g04030	3
	Novel_2	tetur10g00560	3
	Novel_2	tetur10g01310	3
	Novel_2	tetur10g02210	3
	Novel_2	tetur10g00690	3
	Novel_2	tetur14g01410	3
	Novel_2	tetur12g00800	3
	Novel_2	tetur11g00630	3
	Novel_2	tetur11g02110	3
	Novel_2	tetur13g01220	3
	Novel_2	tetur13g04330	3
	Novel_2	tetur10g00460	3
	Novel_2	tetur08g03750	3
	Novel_2	tetur25g00660	3
	Novel_2	tetur07g06520	3
	Novel_2	tetur120g00010	3
	Novel_2	tetur35g01470	3
	Novel_2	tetur11g00150	3
	Novel_2	tetur10g00980	3
	Novel_2	tetur10g01380	3
	Novel_2	tetur11g03340	3
	Novel_2	tetur10g00680	3
	Novel_2	tetur10g00400	3
	Novel_2	tetur04g02550	3
	Novel_2	tetur109g00010	3
	Novel_2	tetur101g00020	3
	Novel_2	tetur13g03280	3
	Novel_2	tetur05g06180	3
	Novel_2	tetur34g01180	3
	Novel_2	tetur10g04260	3
	Novel_2	tetur44g00210	3
	Novel_2	tetur20g03110	3
	Novel_2	tetur10g01600	3
	Novel_2	tetur10g05530	3
	Novel_2	tetur14g03480	3
	Novel_2	tetur11g03320	3
	Novel_2	tetur16g00630	3
	Novel_2	tetur34g01130	3
	Novel_2	tetur08g02750	3
	Novel_2	tetur112g00010	3
	Novel_2	tetur11g03710	3
	Novel_2	tetur13g03440	3
	Novel_2	tetur14g00900	3
	Novel_20	tetur10g04220	3
	Novel_20	tetur13g04300	3
	Novel_20	tetur04g00170	3
	Novel_20	tetur13g02480	3
	Novel_21	tetur12g00660	3
	Novel_21	tetur10g04100	3
	Novel_21	tetur30g00630	3
	Novel_22	tetur14g00610	3
	Novel_22	tetur24g00120	3
	Novel_25	tetur10g00640	3
	Novel_25	tetur13g02720	3
	Novel_26	tetur13g02720	3
	Novel_26	tetur13g04330	3
	Novel_26	tetur139g00030	3
	Novel_26	tetur13g03660	3
	Novel_26	tetur11g01610	3
	Novel_26	tetur05g04960	3
	Novel_26	tetur11g03860	3
	Novel_26	tetur11g04280	3
	Novel_26	tetur14g00900	3
	Novel_26	tetur13g02540	3
	Novel_26	tetur11g03730	3
	Novel_26	tetur10g01300	3
	Novel_26	tetur10g00680	3
	Novel_26	tetur11g02460	3
	Novel_26	tetur14g01740	3
	Novel_26	tetur15g00740	3
	Novel_26	tetur10g01690	3
	Novel_26	tetur10g05080	3
	Novel_26	tetur15g00540	3
	Novel_26	tetur11g03770	3
	Novel_26	tetur24g01230	3
	Novel_26	tetur10g02010	3
	Novel_26	tetur01g16220	3
	Novel_26	tetur10g00970	3
	Novel_26	tetur11g01310	3
	Novel_26	tetur14g03020	3
	Novel_26	tetur13g01220	3
	Novel_26	tetur13g00160	3
	Novel_26	tetur17g00200	3
	Novel_26	tetur11g04180	3
	Novel_26	tetur14g03510	3
	Novel_26	tetur15g03840	3
	Novel_26	tetur05g01260	3
	Novel_26	tetur13g01370	3
	Novel_26	tetur10g04400	3
	Novel_26	tetur19g01640	3
	Novel_26	tetur29g01420	3
	Novel_26	tetur21g02220	3
	Novel_26	tetur07g06670	3
	Novel_26	tetur11g01540	3
	Novel_26	tetur14g02400	3
	Novel_26	tetur02g05880	3
	Novel_26	tetur11g04740	3
	Novel_26	tetur10g03850	3
	Novel_26	tetur02g13850	3
	Novel_26	tetur15g01640	3
	Novel_26	tetur20g03010	3
	Novel_26	tetur05g07220	3
	Novel_26	tetur13g01690	3
	Novel_26	tetur14g01540	3
	Novel_26	tetur02g07850	3
	Novel_26	tetur10g03930	3
	Novel_26	tetur02g11050	3
	Novel_26	tetur08g03310	3
	Novel_26	tetur09g05320	3
	Novel_26	tetur19g03220	3
	Novel_26	tetur21g01190	3
	Novel_26	tetur26g01700	3
	Novel_27	tetur10g00270	3
	Novel_27	tetur10g02170	3
	Novel_27	tetur10g02010	3
	Novel_27	tetur10g00460	3
	Novel_27	tetur10g01080	3
	Novel_27	tetur10g05130	3
	Novel_27	tetur10g00160	3
	Novel_27	tetur10g04180	3
	Novel_27	tetur10g01500	3
	Novel_27	tetur10g04380	3
	Novel_27	tetur10g01350	3
	Novel_27	tetur10g02950	3
	Novel_27	tetur13g01280	3
	Novel_27	tetur10g01950	3
	Novel_27	tetur11g00780	3
	Novel_27	tetur01g16351	3
	Novel_27	tetur109g00020	3
	Novel_27	tetur05g07030	3
	Novel_27	tetur11g05090	3
	Novel_27	tetur30g01010	3
	Novel_27	tetur01g04310	3
	Novel_27	tetur02g10600	3
	Novel_27	tetur07g01000	3
	Novel_27	tetur11g04040	3
	Novel_27	tetur32g00370	3
	Novel_28	tetur01g09810	3
	Novel_28	tetur11g03170	3
	Novel_29	tetur10g01500	3
	Novel_29	tetur10g01350	3
	Novel_29	tetur10g02590	3
	Novel_29	tetur11g03340	3
	Novel_29	tetur11g03730	3
	Novel_29	tetur12g04060	3
	Novel_29	tetur10g01050	3
	Novel_29	tetur10g04400	3
	Novel_29	tetur10g04120	3
	Novel_29	tetur13g04070	3
	Novel_29	tetur05g07250	3
	Novel_29	tetur10g04050	3
	Novel_29	tetur10g00790	3
	Novel_29	tetur11g01280	3
	Novel_29	tetur05g03200	3
	Novel_29	tetur13g00820	3
	Novel_3	tetur10g01080	3
	Novel_3	tetur10g00270	3
	Novel_3	tetur02g09280	3
	Novel_3	tetur23g02080	3
	Novel_30	tetur03g05760	3
	Novel_30	tetur14g01030	3
	Novel_31	tetur10g00180	3
	Novel_31	tetur10g02240	3
	Novel_31	tetur13g03530	3
	Novel_31	tetur10g04900	3
	Novel_32	tetur10g04560	3
	Novel_32	tetur14g03680	3
	Novel_32	tetur10g00490	3
	Novel_32	tetur13g00170	3
	Novel_32	tetur14g01610	3
	Novel_32	tetur26g01180	3
	Novel_33	tetur10g05130	3
	Novel_33	tetur14g00200	3
	Novel_33	tetur10g04840	3
	Novel_33	tetur11g04730	3
	Novel_33	tetur13g04020	3
	Novel_33	tetur10g01300	3
	Novel_33	tetur13g01310	3
	Novel_33	tetur12g01530	3
	Novel_33	tetur11g05650	3
	Novel_33	tetur13g03200	3
	Novel_33	tetur02g04250	3
	Novel_34	tetur11g04420	3
	Novel_34	tetur11g00150	3
	Novel_34	tetur13g03460	3
	Novel_34	tetur05g04240	3
	Novel_34	tetur15g01670	3
	Novel_35	tetur13g03020	3
	Novel_35	tetur15g01940	3
	Novel_35	tetur10g01600	3
	Novel_35	tetur15g03160	3
	Novel_36	tetur13g02410	3
	Novel_36	tetur08g04260	3
	Novel_37	tetur10g00560	3
	Novel_37	tetur10g02350	3
	Novel_37	tetur10g00240	3
	Novel_39	tetur101g00020	3
	Novel_39	tetur10g01080	3
	Novel_39	tetur10g05080	3
	Novel_39	tetur31g01290	3
	Novel_39	tetur10g00010	3
	Novel_39	tetur14g00210	3
	Novel_39	tetur15g01700	3
	Novel_39	tetur03g06470	3
	Novel_39	tetur33g00770	3
	Novel_4	tetur10g03470	3
	Novel_4	tetur11g02170	3
	Novel_4	tetur10g00690	3
	Novel_41	tetur11g03920	3
	Novel_41	tetur08g02880	3
	Novel_41	tetur02g10040	3
	Novel_41	tetur26g00260	3
	Novel_41	tetur02g08060	3
	Novel_41	tetur16g02380	3
	Novel_42	tetur10g04970	3
	Novel_42	tetur10g04040	3
	Novel_42	tetur02g00150	3
	Novel_42	tetur30g01510	3
	Novel_43	tetur10g00460	3
	Novel_43	tetur32g00510	3
	Novel_43	tetur10g00640	3
	Novel_43	tetur12g00640	3
	Novel_43	tetur10g04020	3
	Novel_44	tetur10g02590	3
	Novel_44	tetur11g04650	3
	Novel_44	tetur10g00370	3
	Novel_44	tetur10g01290	3
	Novel_44	tetur10g01150	3
	Novel_44	tetur11g01540	3
	Novel_44	tetur13g00350	3
	Novel_44	tetur11g06020	3
	Novel_44	tetur15g01510	3
	Novel_44	tetur11g02610	3
	Novel_44	tetur01g11340	3
	Novel_44	tetur18g03701	3
	Novel_45	tetur11g02400	3
	Novel_45	tetur11g03980	3
	Novel_45	tetur13g00160	3
	Novel_45	tetur10g04970	3
	Novel_45	tetur07g03850	3
	Novel_45	tetur01g08280	3
	Novel_45	tetur14g03650	3
	Novel_45	tetur11g04970	3
	Novel_45	tetur14g02680	3
	Novel_45	tetur11g05500	3
	Novel_45	tetur01g00740	3
	Novel_45	tetur10g04470	3
	Novel_45	tetur10g04120	3
	Novel_45	tetur10g01980	3
	Novel_45	tetur01g02920	3
	Novel_45	tetur11g04050	3
	Novel_45	tetur04g04380	3
	Novel_45	tetur14g03190	3
	Novel_45	tetur13g03840	3
	Novel_45	tetur13g02300	3
	Novel_45	tetur07g06790	3
	Novel_45	tetur04g01930	3
	Novel_45	tetur04g00720	3
	Novel_45	tetur06g05740	3
	Novel_45	tetur29g01540	3
	Novel_45	tetur38g00390	3
	Novel_45	tetur06g01430	3
	Novel_45	tetur13g01990	3
	Novel_45	tetur10g00730	3
	Novel_45	tetur28g00050	3
	Novel_45	tetur08g04130	3
	Novel_45	tetur10g00350	3
	Novel_45	tetur19g00350	3
	Novel_45	tetur36g01320	3
	Novel_46	tetur13g03660	3
	Novel_46	tetur13g02710	3
	Novel_46	tetur10g02950	3
	Novel_46	tetur14g00610	3
	Novel_46	tetur15g00330	3
	Novel_46	tetur13g02720	3
	Novel_46	tetur10g00080	3
	Novel_46	tetur21g02900	3
	Novel_46	tetur10g03930	3
	Novel_46	tetur12g00100	3
	Novel_46	tetur20g02050	3
	Novel_46	tetur02g00430	3
	Novel_46	tetur10g04250	3
	Novel_47	tetur10g02010	3
	Novel_47	tetur10g01690	3
	Novel_47	tetur11g04630	3
	Novel_47	tetur10g03000	3
	Novel_47	tetur25g01750	3
	Novel_47	tetur11g05500	3
	Novel_47	tetur14g03190	3
	Novel_47	tetur10g04180	3
	Novel_47	tetur14g02100	3
	Novel_47	tetur19g01310	3
	Novel_47	tetur10g00740	3
	Novel_47	tetur01g14680	3
	Novel_47	tetur01g08330	3
	Novel_47	tetur10g04410	3
	Novel_47	tetur11g02310	3
	Novel_47	tetur136g00040	3
	Novel_48	tetur10g04410	3
	Novel_48	tetur13g00790	3
	Novel_48	tetur13g03720	3
	Novel_48	tetur11g01270	3
	Novel_48	tetur10g00440	3
	Novel_48	tetur29g01370	3
	Novel_49	tetur14g03680	3
	Novel_49	tetur10g01080	3
	Novel_49	tetur10g00160	3
	Novel_49	tetur10g04400	3
	Novel_49	tetur11g04380	3
	Novel_49	tetur10g00460	3
	Novel_49	tetur13g00970	3
	Novel_49	tetur10g01390	3
	Novel_49	tetur26g02670	3
	Novel_49	tetur13g00670	3
	Novel_49	tetur10g00370	3
	Novel_49	tetur10g01150	3
	Novel_49	tetur10g01280	3
	Novel_49	tetur10g00560	3
	Novel_49	tetur03g03000	3
	Novel_49	tetur12g01320	3
	Novel_49	tetur10g02710	3
	Novel_49	tetur32g00870	3
	Novel_49	tetur13g00210	3
	Novel_49	tetur10g04500	3
	Novel_49	tetur10g01620	3
	Novel_49	tetur10g01350	3
	Novel_49	tetur10g00490	3
	Novel_49	tetur03g01870	3
	Novel_49	tetur10g05390	3
	Novel_49	tetur14g03510	3
	Novel_49	tetur01g05580	3
	Novel_49	tetur09g05350	3
	Novel_49	tetur17g00850	3
	Novel_49	tetur13g01220	3
	Novel_49	tetur26g00920	3
	Novel_49	tetur03g07660	3
	Novel_49	tetur26g00940	3
	Novel_5	tetur10g00240	3
	Novel_5	tetur05g04220	3
	Novel_5	tetur10g02950	3
	Novel_5	tetur10g04710	3
	Novel_5	tetur23g00730	3
	Novel_5	tetur11g03090	3
	Novel_5	tetur11g04030	3
	Novel_5	tetur08g03590	3
	Novel_50	tetur10g03470	3
	Novel_50	tetur13g03800	3
	Novel_50	tetur11g04750	3
	Novel_50	tetur10g02700	3
	Novel_50	tetur41g00590	3
	Novel_51	tetur10g01170	3
	Novel_52	tetur15g01900	3
	Novel_52	tetur11g02170	3
	Novel_52	tetur10g01500	3
	Novel_52	tetur11g04380	3
	Novel_52	tetur10g02170	3
	Novel_52	tetur10g05080	3
	Novel_52	tetur10g02750	3
	Novel_52	tetur10g02310	3
	Novel_52	tetur29g01160	3
	Novel_52	tetur01g06620	3
	Novel_52	tetur15g00120	3
	Novel_52	tetur10g00970	3
	Novel_52	tetur11g00260	3
	Novel_52	tetur14g00700	3
	Novel_52	tetur13g04330	3
	Novel_52	tetur13g01280	3
	Novel_52	tetur10g04710	3
	Novel_52	tetur10g01340	3
	Novel_52	tetur13g00570	3
	Novel_52	tetur11g04540	3
	Novel_52	tetur14g00650	3
	Novel_52	tetur11g02280	3
	Novel_52	tetur10g04840	3
	Novel_52	tetur13g00740	3
	Novel_52	tetur10g03450	3
	Novel_52	tetur11g00150	3
	Novel_52	tetur13g01720	3
	Novel_52	tetur14g02670	3
	Novel_52	tetur10g01150	3
	Novel_52	tetur10g02710	3
	Novel_52	tetur11g00290	3
	Novel_52	tetur10g04730	3
	Novel_52	tetur11g02610	3
	Novel_52	tetur08g01340	3
	Novel_52	tetur10g02600	3
	Novel_52	tetur10g02010	3
	Novel_52	tetur06g01410	3
	Novel_52	tetur10g02110	3
	Novel_52	tetur11g00420	3
	Novel_52	tetur13g02270	3
	Novel_52	tetur11g00180	3
	Novel_52	tetur10g02810	3
	Novel_52	tetur03g04660	3
	Novel_52	tetur07g01370	3
	Novel_52	tetur09g02350	3
	Novel_52	tetur10g04990	3
	Novel_52	tetur15g01460	3
	Novel_52	tetur10g03930	3
	Novel_52	tetur11g04410	3
	Novel_52	tetur10g04850	3
	Novel_52	tetur05g08770	3
	Novel_52	tetur21g01910	3
	Novel_52	tetur01g06070	3
	Novel_52	tetur11g01610	3
	Novel_52	tetur02g07020	3
	Novel_52	tetur25g01600	3
	Novel_52	tetur03g02150	3
	Novel_52	tetur31g01290	3
	Novel_52	tetur13g03460	3
	Novel_52	tetur05g06910	3
	Novel_52	tetur21g02650	3
	Novel_52	tetur11g01820	3
	Novel_52	tetur01g13490	3
	Novel_52	tetur02g00480	3
	Novel_52	tetur03g02190	3
	Novel_52	tetur05g04260	3
	Novel_53	tetur10g05080	3
	Novel_53	tetur10g01290	3
	Novel_53	tetur11g05050	3
	Novel_54	tetur10g01690	3
	Novel_54	tetur10g02170	3
	Novel_54	tetur10g02420	3
	Novel_54	tetur13g00150	3
	Novel_54	tetur10g04030	3
	Novel_55	tetur10g00640	3
	Novel_55	tetur10g04840	3
	Novel_55	tetur44g00010	3
	Novel_55	tetur15g00120	3
	Novel_55	tetur11g03550	3
	Novel_55	tetur11g00680	3
	Novel_55	tetur08g04990	3
	Novel_55	tetur13g03200	3
	Novel_55	tetur29g00860	3
	Novel_55	tetur08g03670	3
	Novel_56	tetur10g01980	3
	Novel_56	tetur14g02680	3
	Novel_56	tetur02g01030	3
	Novel_57	tetur10g01980	3
	Novel_57	tetur10g01150	3
	Novel_57	tetur10g02700	3
	Novel_58	tetur10g03170	3
	Novel_58	tetur20g00350	3
	Novel_58	tetur04g04380	3
	Novel_58	tetur15g01920	3
	Novel_58	tetur13g01730	3
	Novel_58	tetur10g00560	3
	Novel_58	tetur17g01750	3
	Novel_59	tetur12g00640	3
	Novel_59	tetur05g00850	3
	Novel_59	tetur22g02640	3
	Novel_6	tetur10g00370	3
	Novel_6	tetur10g03850	3
	Novel_6	tetur10g02260	3
	Novel_6	tetur10g01140	3
	Novel_6	tetur35g01240	3
	Novel_6	tetur35g01280	3
	Novel_61	tetur10g01640	3
	Novel_61	tetur136g00040	3
	Novel_62	tetur13g01380	3
	Novel_62	tetur03g06490	3
	Novel_62	tetur01g10220	3
	Novel_62	tetur08g04770	3
	Novel_62	tetur10g01570	3
	Novel_62	tetur10g04300	3
	Novel_63	tetur10g04840	3
	Novel_63	tetur10g00640	3
	Novel_63	tetur14g01740	3
	Novel_63	tetur10g02590	3
	Novel_63	tetur06g01410	3
	Novel_63	tetur36g01190	3
	Novel_63	tetur11g04380	3
	Novel_63	tetur10g04500	3
	Novel_63	tetur11g03550	3
	Novel_63	tetur11g03020	3
	Novel_63	tetur15g00540	3
	Novel_63	tetur26g02780	3
	Novel_63	tetur10g03520	3
	Novel_63	tetur10g04100	3
	Novel_63	tetur11g00260	3
	Novel_63	tetur13g03370	3
	Novel_63	tetur10g04140	3
	Novel_63	tetur03g09480	3
	Novel_63	tetur13g02670	3
	Novel_63	tetur27g01650	3
	Novel_63	tetur30g00350	3
	Novel_63	tetur14g03440	3
	Novel_63	tetur04g03830	3
	Novel_63	tetur07g06520	3
	Novel_63	tetur611g00010	3
	Novel_63	tetur04g01500	3
	Novel_63	tetur01g05680	3
	Novel_63	tetur06g02100	3
	Novel_63	tetur11g04710	3
	Novel_63	tetur18g00650	3
	Novel_64	tetur11g04380	3
	Novel_64	tetur10g04120	3
	Novel_64	tetur13g04500	3
	Novel_64	tetur10g00260	3
	Novel_64	tetur13g03620	3
	Novel_64	tetur13g03200	3
	Novel_64	tetur15g01730	3
	Novel_64	tetur20g02050	3
	Novel_64	tetur10g02620	3
	Novel_64	tetur10g00350	3
	Novel_64	tetur10g03840	3
	Novel_65	tetur10g01370	3
	Novel_65	tetur10g02710	3
	Novel_65	tetur10g01040	3
	Novel_65	tetur10g00460	3
	Novel_65	tetur10g01120	3
	Novel_65	tetur11g01060	3
	Novel_65	tetur10g01300	3
	Novel_65	tetur10g04830	3
	Novel_65	tetur11g00290	3
	Novel_66	tetur10g00480	3
	Novel_66	tetur10g03970	3
	Novel_66	tetur11g03730	3
	Novel_66	tetur02g13900	3
	Novel_67	tetur10g03970	3
	Novel_67	tetur11g02610	3
	Novel_67	tetur11g04650	3
	Novel_67	tetur13g02980	3
	Novel_67	tetur10g01150	3
	Novel_67	tetur10g05410	3
	Novel_67	tetur10g00260	3
	Novel_67	tetur10g04500	3
	Novel_67	tetur10g01290	3
	Novel_67	tetur10g00640	3
	Novel_67	tetur10g00270	3
	Novel_67	tetur14g01550	3
	Novel_67	tetur13g00210	3
	Novel_67	tetur13g00570	3
	Novel_67	tetur11g00290	3
	Novel_67	tetur13g02720	3
	Novel_67	tetur14g00730	3
	Novel_67	tetur10g04970	3
	Novel_67	tetur14g03510	3
	Novel_67	tetur10g00370	3
	Novel_67	tetur13g01690	3
	Novel_67	tetur11g04410	3
	Novel_67	tetur11g00150	3
	Novel_67	tetur25g01600	3
	Novel_67	tetur13g02120	3
	Novel_67	tetur11g01620	3
	Novel_67	tetur10g04390	3
	Novel_67	tetur11g02290	3
	Novel_67	tetur14g02100	3
	Novel_67	tetur10g04410	3
	Novel_67	tetur10g02130	3
	Novel_67	tetur13g02270	3
	Novel_67	tetur11g03340	3
	Novel_67	tetur10g03450	3
	Novel_67	tetur10g04560	3
	Novel_67	tetur11g03020	3
	Novel_67	tetur01g10220	3
	Novel_67	tetur12g03840	3
	Novel_67	tetur02g13410	3
	Novel_67	tetur14g01920	3
	Novel_67	tetur10g05400	3
	Novel_67	tetur28g02060	3
	Novel_67	tetur23g01690	3
	Novel_67	tetur11g02760	3
	Novel_67	tetur20g00210	3
	Novel_67	tetur11g06140	3
	Novel_67	tetur12g00430	3
	Novel_67	tetur05g06910	3
	Novel_67	tetur20g01480	3
	Novel_67	tetur10g04710	3
	Novel_67	tetur02g08210	3
	Novel_67	tetur06g00880	3
	Novel_67	tetur08g02870	3
	Novel_68	tetur10g00370	3
	Novel_68	tetur10g02000	3
	Novel_68	tetur13g01820	3
	Novel_68	tetur11g02130	3
	Novel_68	tetur13g03920	3
	Novel_68	tetur17g00610	3
	Novel_68	tetur02g04980	3
	Novel_68	tetur11g00190	3
	Novel_68	tetur07g07520	3
	Novel_69	tetur10g01290	3
	Novel_69	tetur15g00120	3
	Novel_69	tetur10g00270	3
	Novel_69	tetur10g00290	3
	Novel_69	tetur12g04480	3
	Novel_69	tetur01g13870	3
	Novel_7	tetur10g00370	3
	Novel_7	tetur10g01500	3
	Novel_7	tetur10g02750	3
	Novel_7	tetur10g00970	3
	Novel_7	tetur10g03230	3
	Novel_7	tetur10g00980	3
	Novel_7	tetur10g02590	3
	Novel_7	tetur10g03680	3
	Novel_7	tetur13g01510	3
	Novel_7	tetur10g02420	3
	Novel_7	tetur05g01260	3
	Novel_7	tetur13g01440	3
	Novel_7	tetur08g05220	3
	Novel_7	tetur11g02570	3
	Novel_7	tetur10g00160	3
	Novel_7	tetur10g01400	3
	Novel_7	tetur30g01230	3
	Novel_7	tetur05g01640	3
	Novel_7	tetur20g01240	3
	Novel_7	tetur11g03700	3
	Novel_7	tetur13g00960	3
	Novel_7	tetur11g02430	3
	Novel_7	tetur03g00240	3
	Novel_7	tetur25g01290	3
	Novel_7	tetur02g09590	3
	Novel_70	tetur10g02590	3
	Novel_70	tetur15g00120	3
	Novel_70	tetur01g08610	3
	Novel_70	tetur33g01130	3
	Novel_70	tetur02g01490	3
	Novel_70	tetur12g00070	3
	Novel_70	tetur10g02510	3
	Novel_70	tetur12g00640	3
	Novel_70	tetur04g00840	3
	Novel_70	tetur10g04580	3
	Novel_70	tetur01g10260	3
	Novel_71	tetur10g00370	3
	Novel_8	tetur15g01900	3
	Novel_8	tetur12g00270	3
	Novel_8	tetur10g00800	3
	Novel_8	tetur14g03500	3
	Novel_8	tetur10g01640	3
	Novel_8	tetur02g04540	3
	Novel_8	tetur32g00510	3
	Novel_8	tetur01g15480	3
	Novel_9	tetur10g03070	3
	Novel_9	tetur11g04280	3
	Novel_9	tetur13g02340	3
	Novel_9	tetur10g00140	3
	Novel_9	tetur11g04950	3
	Novel_9	tetur10g02550	3
	Novel_9	tetur14g00840	3
	Novel_9	tetur11g02080	3
	Novel_9	tetur10g02690	3
	Novel_9	tetur09g02080	3
	tci-miR-10-3p	tetur14g03500	3
	tci-miR-10-3p	tetur15g01900	3
	tci-miR-10-3p	tetur10g01640	3
	tci-miR-10-3p	tetur27g00120	3
	tci-miR-10-3p	tetur13g01310	3
	tci-miR-10-3p	tetur10g04260	3
	tci-miR-10-3p	tetur32g00510	3
	tci-miR-10-3p	tetur11g01390	3
	tci-miR-10-3p	tetur09g06130	3
	tci-miR-10-3p	tetur19g02380	3
	tci-miR-10-5p	tetur11g05500	3
	tci-miR-124-1-5p	tetur11g04420	3
	tci-miR-124-1-5p	tetur11g04650	3
	tci-miR-124-1-5p	tetur10g01350	3
	tci-miR-124-1-5p	tetur13g02710	3
	tci-miR-124-1-5p	tetur13g03630	3
	tci-miR-124-1-5p	tetur15g04107	3
	tci-miR-124-1-5p	tetur01g09490	3
	tci-miR-124-1-5p	tetur13g00790	3
	tci-miR-124-1-5p	tetur01g10600	3
	tci-miR-124-1-5p	tetur10g03040	3
	tci-miR-124-1-5p	tetur02g09260	3
	tci-miR-124-1-5p	tetur13g00640	3
	tci-miR-124-1-5p	tetur11g03340	3
	tci-miR-124-1-5p	tetur19g02540	3
	tci-miR-124-1-5p	tetur24g00570	3
	tci-miR-124-1-5p	tetur32g00390	3
	tci-miR-124-1-5p	tetur01g00360	3
	tci-miR-124-1-5p	tetur01g03230	3
	tci-miR-124-1-5p	tetur07g04160	3
	tci-miR-124-1-5p	tetur10g00770	3
	tci-miR-124-1-5p	tetur10g03080	3
	tci-miR-124-1-5p	tetur11g01830	3
	tci-miR-124-1-5p	tetur21g02220	3
	tci-miR-124-2-5p	tetur11g04420	3
	tci-miR-124-2-5p	tetur13g02710	3
	tci-miR-124-2-5p	tetur13g00790	3
	tci-miR-124-2-5p	tetur11g03340	3
	tci-miR-124-2-5p	tetur19g02540	3
	tci-miR-124-2-5p	tetur12g01320	3
	tci-miR-124-2-5p	tetur11g04950	3
	tci-miR-124-2-5p	tetur03g05440	3
	tci-miR-124-2-5p	tetur28g00690	3
	tci-miR-124-2-5p	tetur15g00120	3
	tci-miR-124-2-5p	tetur26g00120	3
	tci-miR-124-2-5p	tetur12g00640	3
	tci-miR-124-2-5p	tetur15g02140	3
	tci-miR-124-2-5p	tetur02g11850	3
	tci-miR-124-2-5p	tetur117g00010	3
	tci-miR-124-2-5p	tetur27g00120	3
	tci-miR-124-2-5p	tetur11g00170	3
	tci-miR-124-2-5p	tetur02g01020	3
	tci-miR-124-2-5p	tetur02g09960	3
	tci-miR-124-2-5p	tetur04g03020	3
	tci-miR-124-3p	tetur19g02540	3
	tci-miR-124-3p	tetur15g00120	3
	tci-miR-124-3p	tetur10g01350	3
	tci-miR-124-3p	tetur10g00240	3
	tci-miR-124-3p	tetur13g03280	3
	tci-miR-124-3p	tetur10g03110	3
	tci-miR-124-3p	tetur14g01410	3
	tci-miR-124-3p	tetur11g01390	3
	tci-miR-124-3p	tetur10g00290	3
	tci-miR-124-3p	tetur11g03920	3
	tci-miR-124-3p	tetur130g00010	3
	tci-miR-124-3p	tetur02g03310	3
	tci-miR-124-3p	tetur11g00430	3
	tci-miR-124-3p	tetur11g01620	3
	tci-miR-124-3p	tetur20g02660	3
	tci-miR-124-3p	tetur17g01440	3
	tci-miR-124-3p	tetur10g02310	3
	tci-miR-124-3p	tetur01g10680	3
	tci-miR-124-3p	tetur43g00380	3
	tci-miR-124-3p	tetur20g00890	3
	tci-miR-124-3p	tetur14g01780	3
	tci-miR-124-3p	tetur02g11510	3
	tci-miR-124-3p	tetur33g00330	3
	tci-miR-124-3p	tetur24g00870	3
	tci-miR-124-3p	tetur19g00930	3
	tci-miR-124-3p	tetur31g01150	3
	tci-miR-12a-3p	tetur10g03680	3
	tci-miR-12a-3p	tetur10g02350	3
	tci-miR-12a-5p	tetur10g01640	3
	tci-miR-12a-5p	tetur10g01340	3
	tci-miR-12a-5p	tetur10g03560	3
	tci-miR-12a-5p	tetur01g03230	3
	tci-miR-12a-5p	tetur11g00610	3
	tci-miR-12a-5p	tetur02g13570	3
	tci-miR-12a-5p	tetur01g12830	3
	tci-miR-12a-5p	tetur01g01170	3
	tci-miR-12b-3p	tetur14g01590	3
	tci-miR-12b-3p	tetur01g14330	3
	tci-miR-12b-5p	tetur10g01350	3
	tci-miR-12b-5p	tetur10g01340	3
	tci-miR-12b-5p	tetur10g03560	3
	tci-miR-12b-5p	tetur13g00790	3
	tci-miR-12b-5p	tetur13g00250	3
	tci-miR-12b-5p	tetur14g02980	3
	tci-miR-12b-5p	tetur12g00660	3
	tci-miR-12b-5p	tetur11g02400	3
	tci-miR-12b-5p	tetur10g00640	3
	tci-miR-12b-5p	tetur01g06430	3
	tci-miR-12b-5p	tetur06g05400	3
	tci-miR-12b-5p	tetur10g01050	3
	tci-miR-12b-5p	tetur26g02080	3
	tci-miR-12b-5p	tetur01g05730	3
	tci-miR-12b-5p	tetur10g03680	3
	tci-miR-12b-5p	tetur11g04760	3
	tci-miR-12b-5p	tetur11g05050	3
	tci-miR-12b-5p	tetur02g09880	3
	tci-miR-133-3p	tetur10g04840	3
	tci-miR-133-3p	tetur05g03420	3
	tci-miR-133-3p	tetur20g00440	3
	tci-miR-133-5p	tetur15g00660	3
	tci-miR-133-5p	tetur13g01170	3
	tci-miR-133-5p	tetur11g02170	3
	tci-miR-133-5p	tetur10g03520	3
	tci-miR-133-5p	tetur10g01350	3
	tci-miR-133-5p	tetur10g01690	3
	tci-miR-133-5p	tetur10g03070	3
	tci-miR-133-5p	tetur130g00010	3
	tci-miR-133-5p	tetur14g02690	3
	tci-miR-133-5p	tetur15g00120	3
	tci-miR-133-5p	tetur18g02550	3
	tci-miR-133-5p	tetur11g03340	3
	tci-miR-133-5p	tetur11g00420	3
	tci-miR-133-5p	tetur10g01300	3
	tci-miR-133-5p	tetur10g05834	3
	tci-miR-133-5p	tetur10g00770	3
	tci-miR-133-5p	tetur31g01270	3
	tci-miR-133-5p	tetur10g02320	3
	tci-miR-133-5p	tetur10g04730	3
	tci-miR-133-5p	tetur15g01940	3
	tci-miR-133-5p	tetur09g05870	3
	tci-miR-133-5p	tetur10g01050	3
	tci-miR-133-5p	tetur10g02590	3
	tci-miR-133-5p	tetur13g00760	3
	tci-miR-133-5p	tetur10g02350	3
	tci-miR-133-5p	tetur22g01790	3
	tci-miR-133-5p	tetur02g08180	3
	tci-miR-133-5p	tetur01g00520	3
	tci-miR-133-5p	tetur10g04610	3
	tci-miR-133-5p	tetur10g00460	3
	tci-miR-133-5p	tetur17g00240	3
	tci-miR-133-5p	tetur10g05130	3
	tci-miR-133-5p	tetur27g00440	3
	tci-miR-133-5p	tetur10g00690	3
	tci-miR-133-5p	tetur12g01050	3
	tci-miR-133-5p	tetur13g00210	3
	tci-miR-133-5p	tetur10g00080	3
	tci-miR-133-5p	tetur03g05460	3
	tci-miR-133-5p	tetur10g04970	3
	tci-miR-133-5p	tetur10g00290	3
	tci-miR-133-5p	tetur01g06620	3
	tci-miR-133-5p	tetur13g02520	3
	tci-miR-133-5p	tetur36g01090	3
	tci-miR-133-5p	tetur10g00560	3
	tci-miR-133-5p	tetur10g05090	3
	tci-miR-133-5p	tetur11g01610	3
	tci-miR-133-5p	tetur10g04120	3
	tci-miR-133-5p	tetur24g01230	3
	tci-miR-133-5p	tetur06g00640	3
	tci-miR-133-5p	tetur22g02350	3
	tci-miR-133-5p	tetur14g01410	3
	tci-miR-133-5p	tetur31g01150	3
	tci-miR-133-5p	tetur10g01290	3
	tci-miR-133-5p	tetur10g03360	3
	tci-miR-133-5p	tetur15g03840	3
	tci-miR-133-5p	tetur11g03770	3
	tci-miR-133-5p	tetur10g04470	3
	tci-miR-133-5p	tetur21g01150	3
	tci-miR-133-5p	tetur11g01520	3
	tci-miR-133-5p	tetur33g01130	3
	tci-miR-133-5p	tetur10g04390	3
	tci-miR-133-5p	tetur27g00200	3
	tci-miR-133-5p	tetur11g04660	3
	tci-miR-133-5p	tetur02g13400	3
	tci-miR-133-5p	tetur13g03460	3
	tci-miR-133-5p	tetur17g03670	3
	tci-miR-133-5p	tetur20g01250	3
	tci-miR-133-5p	tetur01g02110	3
	tci-miR-133-5p	tetur25g01680	3
	tci-miR-133-5p	tetur19g00120	3
	tci-miR-133-5p	tetur27g01470	3
	tci-miR-133-5p	tetur13g00150	3
	tci-miR-133-5p	tetur21g01910	3
	tci-miR-133-5p	tetur30g00500	3
	tci-miR-133-5p	tetur12g02220	3
	tci-miR-133-5p	tetur10g02600	3
	tci-miR-133-5p	tetur10g02130	3
	tci-miR-133-5p	tetur11g02570	3
	tci-miR-133-5p	tetur31g00120	3
	tci-miR-133-5p	tetur17g03720	3
	tci-miR-133-5p	tetur02g03890	3
	tci-miR-133-5p	tetur27g01220	3
	tci-miR-133-5p	tetur22g01260	3
	tci-miR-133-5p	tetur15g00540	3
	tci-miR-133-5p	tetur10g00730	3
	tci-miR-133-5p	tetur25g00470	3
	tci-miR-133-5p	tetur26g00260	3
	tci-miR-133-5p	tetur25g00420	3
	tci-miR-133-5p	tetur15g01640	3
	tci-miR-133-5p	tetur02g14691	3
	tci-miR-133-5p	tetur13g04130	3
	tci-miR-133-5p	tetur07g06860	3
	tci-miR-133-5p	tetur06g03160	3
	tci-miR-133-5p	tetur02g00420	3
	tci-miR-133-5p	tetur02g05800	3
	tci-miR-133-5p	tetur17g01760	3
	tci-miR-133-5p	tetur20g00200	3
	tci-miR-133-5p	tetur07g03020	3
	tci-miR-133-5p	tetur43g00450	3
	tci-miR-133-5p	tetur41g00200	3
	tci-miR-133-5p	tetur10g05420	3
	tci-miR-133-5p	tetur29g00140	3
	tci-miR-133-5p	tetur02g12540	3
	tci-miR-133-5p	tetur01g06100	3
	tci-miR-133-5p	tetur14g01620	3
	tci-miR-133-5p	tetur21g00020	3
	tci-miR-133-5p	tetur25g01040	3
	tci-miR-133-5p	tetur25g00180	3
	tci-miR-133-5p	tetur19g02190	3
	tci-miR-133-5p	tetur11g04910	3
	tci-miR-137-3p	tetur13g03680	3
	tci-miR-137-3p	tetur101g00020	3
	tci-miR-137-3p	tetur19g00790	3
	tci-miR-137-3p	tetur02g01590	3
	tci-miR-137-3p	tetur32g01770	3
	tci-miR-137-5p	tetur11g00500	3
	tci-miR-137-5p	tetur11g03830	3
	tci-miR-137-5p	tetur10g03520	3
	tci-miR-137-5p	tetur10g00460	3
	tci-miR-137-5p	tetur19g01400	3
	tci-miR-137-5p	tetur11g06170	3
	tci-miR-137-5p	tetur10g01580	3
	tci-miR-137-5p	tetur29g01040	3
	tci-miR-137-5p	tetur13g03560	3
	tci-miR-137-5p	tetur11g04630	3
	tci-miR-137-5p	tetur08g02220	3
	tci-miR-137-5p	tetur13g03840	3
	tci-miR-1-3p	tetur10g00460	3
	tci-miR-1-3p	tetur10g04600	3
	tci-miR-1-3p	tetur11g04380	3
	tci-miR-1-3p	tetur10g00240	3
	tci-miR-1-3p	tetur10g00470	3
	tci-miR-1-3p	tetur11g01610	3
	tci-miR-1-3p	tetur10g01380	3
	tci-miR-1-3p	tetur15g00330	3
	tci-miR-1-3p	tetur10g04410	3
	tci-miR-1-3p	tetur10g02560	3
	tci-miR-1-3p	tetur13g02140	3
	tci-miR-1-3p	tetur10g02510	3
	tci-miR-1-3p	tetur10g00400	3
	tci-miR-1-3p	tetur10g01150	3
	tci-miR-1-3p	tetur13g00150	3
	tci-miR-1-3p	tetur10g04560	3
	tci-miR-1-3p	tetur13g04500	3
	tci-miR-1-3p	tetur16g02800	3
	tci-miR-1-3p	tetur10g00680	3
	tci-miR-1-3p	tetur13g02410	3
	tci-miR-1-3p	tetur14g03510	3
	tci-miR-1-3p	tetur136g00040	3
	tci-miR-1-3p	tetur10g00100	3
	tci-miR-1-3p	tetur27g02390	3
	tci-miR-1-3p	tetur15g02000	3
	tci-miR-1-3p	tetur10g00160	3
	tci-miR-1-3p	tetur32g02120	3
	tci-miR-1-3p	tetur14g00450	3
	tci-miR-1-3p	tetur06g02120	3
	tci-miR-1-3p	tetur30g01180	3
	tci-miR-1-3p	tetur19g02010	3
	tci-miR-1-3p	tetur01g00570	3
	tci-miR-1-3p	tetur20g02950	3
	tci-miR-1-3p	tetur02g05710	3
	tci-miR-1-3p	tetur19g01060	3
	tci-miR-1-3p	tetur01g03140	3
	tci-miR-1-5p	tetur10g02000	3
	tci-miR-1-5p	tetur10g02700	3
	tci-miR-184-3p	tetur11g04380	3
	tci-miR-184-3p	tetur13g02710	3
	tci-miR-184-3p	tetur12g00660	3
	tci-miR-184-3p	tetur11g03550	3
	tci-miR-184-3p	tetur15g00120	3
	tci-miR-184-3p	tetur11g04420	3
	tci-miR-184-3p	tetur27g00440	3
	tci-miR-184-3p	tetur14g02670	3
	tci-miR-184-3p	tetur13g04330	3
	tci-miR-184-3p	tetur10g03680	3
	tci-miR-184-3p	tetur28g01610	3
	tci-miR-184-3p	tetur10g01500	3
	tci-miR-184-3p	tetur10g04680	3
	tci-miR-184-3p	tetur11g00190	3
	tci-miR-184-3p	tetur13g01750	3
	tci-miR-184-3p	tetur36g01190	3
	tci-miR-184-3p	tetur13g03680	3
	tci-miR-184-3p	tetur13g03020	3
	tci-miR-184-3p	tetur10g04730	3
	tci-miR-184-3p	tetur10g00800	3
	tci-miR-184-3p	tetur14g01410	3
	tci-miR-184-3p	tetur33g01130	3
	tci-miR-184-3p	tetur31g01290	3
	tci-miR-184-3p	tetur15g02330	3
	tci-miR-184-3p	tetur13g04240	3
	tci-miR-184-3p	tetur02g01500	3
	tci-miR-184-3p	tetur12g00390	3
	tci-miR-184-3p	tetur02g00710	3
	tci-miR-184-3p	tetur15g01890	3
	tci-miR-184-3p	tetur32g00040	3
	tci-miR-184-3p	tetur12g04060	3
	tci-miR-184-3p	tetur02g01890	3
	tci-miR-184-3p	tetur04g00940	3
	tci-miR-184-3p	tetur19g01210	3
	tci-miR-184-3p	tetur05g06540	3
	tci-miR-184-3p	tetur01g05660	3
	tci-miR-184-3p	tetur21g00200	3
	tci-miR-184-5p	tetur10g04500	3
	tci-miR-184-5p	tetur15g00120	3
	tci-miR-184-5p	tetur19g02540	3
	tci-miR-184-5p	tetur14g00380	3
	tci-miR-184-5p	tetur14g03680	3
	tci-miR-184-5p	tetur13g00740	3
	tci-miR-184-5p	tetur11g02130	3
	tci-miR-184-5p	tetur11g00170	3
	tci-miR-184-5p	tetur12g00690	3
	tci-miR-184-5p	tetur11g04760	3
	tci-miR-184-5p	tetur11g04330	3
	tci-miR-184-5p	tetur11g02530	3
	tci-miR-184-5p	tetur05g01340	3
	tci-miR-184-5p	tetur25g00940	3
	tci-miR-184-5p	tetur12g01550	3
	tci-miR-184-5p	tetur23g00730	3
	tci-miR-184-5p	tetur19g01850	3
	tci-miR-190-3p	tetur15g00660	3
	tci-miR-190-3p	tetur10g01390	3
	tci-miR-190-3p	tetur10g00640	3
	tci-miR-190-3p	tetur10g02420	3
	tci-miR-190-3p	tetur26g00190	3
	tci-miR-190-5p	tetur10g01940	3
	tci-miR-190-5p	tetur13g00740	3
	tci-miR-190-5p	tetur10g03520	3
	tci-miR-190-5p	tetur10g04070	3
	tci-miR-190-5p	tetur10g00240	3
	tci-miR-190-5p	tetur13g02810	3
	tci-miR-190-5p	tetur13g03720	3
	tci-miR-190-5p	tetur28g02090	3
	tci-miR-190-5p	tetur11g05850	3
	tci-miR-190-5p	tetur27g02200	3
	tci-miR-190-5p	tetur03g02050	3
	tci-miR-190-5p	tetur21g01050	3
	tci-miR-190-5p	tetur148g00040	3
	tci-miR-210-3p	tetur11g04380	3
	tci-miR-210-3p	tetur11g02400	3
	tci-miR-210-3p	tetur11g04310	3
	tci-miR-210-3p	tetur13g00760	3
	tci-miR-210-3p	tetur10g01280	3
	tci-miR-210-3p	tetur26g02780	3
	tci-miR-210-3p	tetur11g00180	3
	tci-miR-210-3p	tetur10g00640	3
	tci-miR-210-3p	tetur13g02710	3
	tci-miR-210-3p	tetur11g03730	3
	tci-miR-210-3p	tetur14g03520	3
	tci-miR-210-3p	tetur22g01570	3
	tci-miR-210-3p	tetur14g03540	3
	tci-miR-210-3p	tetur33g00320	3
	tci-miR-210-3p	tetur01g16210	3
	tci-miR-210-3p	tetur15g04107	3
	tci-miR-210-3p	tetur02g10330	3
	tci-miR-210-3p	tetur14g03640	3
	tci-miR-210-3p	tetur11g02760	3
	tci-miR-210-3p	tetur14g00200	3
	tci-miR-210-3p	tetur22g02370	3
	tci-miR-210-3p	tetur14g01610	3
	tci-miR-210-3p	tetur01g13000	3
	tci-miR-210-3p	tetur03g08870	3
	tci-miR-210-3p	tetur27g01660	3
	tci-miR-210-3p	tetur32g01120	3
	tci-miR-210-3p	tetur33g00560	3
	tci-miR-210-5p	tetur10g00640	3
	tci-miR-210-5p	tetur13g02710	3
	tci-miR-210-5p	tetur10g02420	3
	tci-miR-210-5p	tetur15g00740	3
	tci-miR-210-5p	tetur10g02960	3
	tci-miR-210-5p	tetur14g01740	3
	tci-miR-210-5p	tetur11g00290	3
	tci-miR-210-5p	tetur10g00560	3
	tci-miR-210-5p	tetur13g01690	3
	tci-miR-210-5p	tetur25g01570	3
	tci-miR-210-5p	tetur17g00200	3
	tci-miR-210-5p	tetur10g04020	3
	tci-miR-210-5p	tetur10g02120	3
	tci-miR-210-5p	tetur25g01200	3
	tci-miR-210-5p	tetur10g00770	3
	tci-miR-210-5p	tetur37g00200	3
	tci-miR-210-5p	tetur11g03170	3
	tci-miR-210-5p	tetur10g04450	3
	tci-miR-210-5p	tetur27g02430	3
	tci-miR-2-3p	tetur10g00370	3
	tci-miR-2-3p	tetur11g02400	3
	tci-miR-2-3p	tetur10g01080	3
	tci-miR-2-3p	tetur14g03680	3
	tci-miR-2-3p	tetur10g00260	3
	tci-miR-2-3p	tetur10g00970	3
	tci-miR-2-3p	tetur10g03910	3
	tci-miR-2-3p	tetur11g04660	3
	tci-miR-2-3p	tetur10g01350	3
	tci-miR-2-3p	tetur10g04500	3
	tci-miR-2-3p	tetur10g01390	3
	tci-miR-2-3p	tetur11g02170	3
	tci-miR-2-3p	tetur10g02600	3
	tci-miR-2-3p	tetur11g00170	3
	tci-miR-2-3p	tetur14g02700	3
	tci-miR-2-3p	tetur01g08280	3
	tci-miR-2-3p	tetur01g14530	3
	tci-miR-2-3p	tetur05g03980	3
	tci-miR-2-3p	tetur09g01250	3
	tci-miR-2-3p	tetur11g03780	3
	tci-miR-2-3p	tetur26g02020	3
	tci-miR-252-3p	tetur10g01690	3
	tci-miR-252-3p	tetur11g04470	3
	tci-miR-252-3p	tetur15g00660	3
	tci-miR-252-3p	tetur11g04310	3
	tci-miR-252-3p	tetur27g02380	3
	tci-miR-252-3p	tetur01g02920	3
	tci-miR-252-3p	tetur23g02200	3
	tci-miR-252-5p	tetur10g01350	3
	tci-miR-252-5p	tetur10g01960	3
	tci-miR-252-5p	tetur20g03140	3
	tci-miR-2-5p	tetur10g00520	3
	tci-miR-2-5p	tetur10g00260	3
	tci-miR-2-5p	tetur11g00500	3
	tci-miR-2-5p	tetur11g02400	3
	tci-miR-2-5p	tetur10g04840	3
	tci-miR-2-5p	tetur10g01300	3
	tci-miR-2-5p	tetur14g00200	3
	tci-miR-2-5p	tetur02g02320	3
	tci-miR-2-5p	tetur10g03070	3
	tci-miR-2-5p	tetur10g05090	3
	tci-miR-2-5p	tetur11g04730	3
	tci-miR-2-5p	tetur10g02960	3
	tci-miR-2-5p	tetur13g03720	3
	tci-miR-2-5p	tetur10g05100	3
	tci-miR-2-5p	tetur18g00360	3
	tci-miR-2-5p	tetur13g03200	3
	tci-miR-2-5p	tetur33g00480	3
	tci-miR-2-5p	tetur19g02480	3
	tci-miR-2-5p	tetur17g00490	3
	tci-miR-2-5p	tetur17g02330	3
	tci-miR-2-5p	tetur24g01870	3
	tci-miR-263a-3p	tetur10g04840	3
	tci-miR-263a-3p	tetur10g01150	3
	tci-miR-263a-3p	tetur10g02590	3
	tci-miR-263a-3p	tetur15g00540	3
	tci-miR-263a-3p	tetur14g03680	3
	tci-miR-263a-3p	tetur13g03660	3
	tci-miR-263a-3p	tetur15g00740	3
	tci-miR-263a-3p	tetur13g04120	3
	tci-miR-263a-3p	tetur13g00150	3
	tci-miR-263a-3p	tetur10g01270	3
	tci-miR-263a-3p	tetur10g02320	3
	tci-miR-263a-3p	tetur10g04120	3
	tci-miR-263a-3p	tetur10g03520	3
	tci-miR-263a-3p	tetur01g16080	3
	tci-miR-263a-3p	tetur10g05794	3
	tci-miR-263a-3p	tetur17g01040	3
	tci-miR-263a-3p	tetur10g03940	3
	tci-miR-263a-3p	tetur10g01350	3
	tci-miR-263a-3p	tetur09g05870	3
	tci-miR-263a-3p	tetur01g03130	3
	tci-miR-263a-3p	tetur02g09960	3
	tci-miR-263a-3p	tetur10g01080	3
	tci-miR-263a-3p	tetur23g00810	3
	tci-miR-263a-3p	tetur10g01050	3
	tci-miR-263a-3p	tetur11g04650	3
	tci-miR-263a-3p	tetur10g00270	3
	tci-miR-263a-3p	tetur13g00760	3
	tci-miR-263a-3p	tetur10g01580	3
	tci-miR-263a-3p	tetur17g03830	3
	tci-miR-263a-3p	tetur07g04420	3
	tci-miR-263a-3p	tetur08g02880	3
	tci-miR-263a-3p	tetur07g07610	3
	tci-miR-263a-3p	tetur25g01680	3
	tci-miR-263a-3p	tetur19g02130	3
	tci-miR-263a-3p	tetur13g03170	3
	tci-miR-263a-3p	tetur04g04600	3
	tci-miR-263a-3p	tetur11g04800	3
	tci-miR-263a-3p	tetur06g05300	3
	tci-miR-263a-3p	tetur22g01840	3
	tci-miR-263a-3p	tetur01g10680	3
	tci-miR-263a-3p	tetur17g01500	3
	tci-miR-263a-3p	tetur04g01550	3
	tci-miR-263a-3p	tetur20g00150	3
	tci-miR-263a-5p	tetur10g04970	3
	tci-miR-263a-5p	tetur26g02700	3
	tci-miR-263a-5p	tetur11g01310	3
	tci-miR-263a-5p	tetur11g04810	3
	tci-miR-263a-5p	tetur25g01820	3
	tci-miR-263a-5p	tetur27g00480	3
	tci-miR-263a-5p	tetur14g03310	3
	tci-miR-263a-5p	tetur01g04260	3
	tci-miR-263a-5p	tetur28g01050	3
	tci-miR-263a-5p	tetur26g02240	3
	tci-miR-263a-5p	tetur07g04010	3
	tci-miR-263a-5p	tetur09g06600	3
	tci-miR-263a-5p	tetur27g00690	3
	tci-miR-263b-3p	tetur10g04970	3
	tci-miR-263b-3p	tetur11g04810	3
	tci-miR-263b-3p	tetur25g01820	3
	tci-miR-263b-3p	tetur13g03630	3
	tci-miR-263b-3p	tetur14g01790	3
	tci-miR-263b-3p	tetur10g01080	3
	tci-miR-263b-3p	tetur11g02400	3
	tci-miR-263b-3p	tetur10g01500	3
	tci-miR-263b-3p	tetur10g00640	3
	tci-miR-263b-3p	tetur30g01920	3
	tci-miR-263b-3p	tetur12g01050	3
	tci-miR-263b-3p	tetur11g03730	3
	tci-miR-263b-3p	tetur13g02720	3
	tci-miR-263b-3p	tetur12g00660	3
	tci-miR-263b-3p	tetur11g04280	3
	tci-miR-263b-3p	tetur11g02510	3
	tci-miR-263b-3p	tetur11g06080	3
	tci-miR-263b-3p	tetur13g02140	3
	tci-miR-263b-3p	tetur10g02750	3
	tci-miR-263b-3p	tetur11g00580	3
	tci-miR-263b-3p	tetur11g03920	3
	tci-miR-263b-3p	tetur14g03320	3
	tci-miR-263b-3p	tetur10g00710	3
	tci-miR-263b-3p	tetur10g04840	3
	tci-miR-263b-3p	tetur10g01270	3
	tci-miR-263b-3p	tetur09g05870	3
	tci-miR-263b-3p	tetur23g00810	3
	tci-miR-263b-3p	tetur10g00480	3
	tci-miR-263b-3p	tetur10g02350	3
	tci-miR-263b-3p	tetur11g04380	3
	tci-miR-263b-3p	tetur10g01690	3
	tci-miR-263b-3p	tetur29g01180	3
	tci-miR-263b-3p	tetur10g04300	3
	tci-miR-263b-3p	tetur10g00800	3
	tci-miR-263b-3p	tetur08g04430	3
	tci-miR-263b-3p	tetur10g03070	3
	tci-miR-263b-3p	tetur10g04920	3
	tci-miR-263b-3p	tetur13g03690	3
	tci-miR-263b-3p	tetur11g04420	3
	tci-miR-263b-3p	tetur14g02690	3
	tci-miR-263b-3p	tetur10g02130	3
	tci-miR-263b-3p	tetur01g16210	3
	tci-miR-263b-3p	tetur10g00980	3
	tci-miR-263b-3p	tetur11g01270	3
	tci-miR-263b-3p	tetur10g05230	3
	tci-miR-263b-3p	tetur10g02880	3
	tci-miR-263b-3p	tetur152g00010	3
	tci-miR-263b-3p	tetur31g01470	3
	tci-miR-263b-3p	tetur11g03760	3
	tci-miR-263b-3p	tetur11g06373	3
	tci-miR-263b-3p	tetur14g01950	3
	tci-miR-263b-3p	tetur02g08340	3
	tci-miR-263b-3p	tetur17g03570	3
	tci-miR-263b-3p	tetur18g00360	3
	tci-miR-263b-3p	tetur12g00800	3
	tci-miR-263b-3p	tetur10g01960	3
	tci-miR-263b-3p	tetur14g03260	3
	tci-miR-263b-3p	tetur26g02670	3
	tci-miR-263b-3p	tetur10g00690	3
	tci-miR-263b-3p	tetur13g01750	3
	tci-miR-263b-3p	tetur19g02380	3
	tci-miR-263b-3p	tetur10g02620	3
	tci-miR-263b-3p	tetur08g03390	3
	tci-miR-263b-3p	tetur10g02650	3
	tci-miR-263b-3p	tetur02g01550	3
	tci-miR-263b-3p	tetur27g00400	3
	tci-miR-263b-3p	tetur26g00260	3
	tci-miR-263b-3p	tetur01g03860	3
	tci-miR-263b-3p	tetur05g00970	3
	tci-miR-263b-3p	tetur10g01040	3
	tci-miR-263b-3p	tetur18g01040	3
	tci-miR-263b-3p	tetur10g01100	3
	tci-miR-263b-3p	tetur09g04330	3
	tci-miR-263b-3p	tetur02g05500	3
	tci-miR-263b-3p	tetur10g04680	3
	tci-miR-263b-3p	tetur19g01110	3
	tci-miR-263b-3p	tetur12g01340	3
	tci-miR-263b-3p	tetur04g06470	3
	tci-miR-263b-3p	tetur14g01410	3
	tci-miR-263b-3p	tetur26g01700	3
	tci-miR-263b-3p	tetur02g15193	3
	tci-miR-263b-3p	tetur14g02460	3
	tci-miR-263b-3p	tetur21g02480	3
	tci-miR-263b-3p	tetur04g06810	3
	tci-miR-263b-3p	tetur26g01480	3
	tci-miR-263b-3p	tetur32g00930	3
	tci-miR-263b-3p	tetur22g00710	3
	tci-miR-263b-3p	tetur29g01370	3
	tci-miR-263b-3p	tetur33g00160	3
	tci-miR-263b-3p	tetur23g01790	3
	tci-miR-263b-3p	tetur29g00860	3
	tci-miR-263b-3p	tetur38g00380	3
	tci-miR-263b-5p	tetur13g03630	3
	tci-miR-263b-5p	tetur11g04280	3
	tci-miR-263b-5p	tetur03g07850	3
	tci-miR-263b-5p	tetur19g03220	3
	tci-miR-263b-5p	tetur11g04650	3
	tci-miR-263b-5p	tetur20g01860	3
	tci-miR-263b-5p	tetur11g01350	3
	tci-miR-263b-5p	tetur08g04060	3
	tci-miR-263b-5p	tetur29g01410	3
	tci-miR-263b-5p	tetur02g11180	3
	tci-miR-263b-5p	tetur01g11340	3
	tci-miR-263b-5p	tetur11g01950	3
	tci-miR-263b-5p	tetur15g02180	3
	tci-miR-276-3p	tetur11g00680	3
	tci-miR-276-3p	tetur02g01550	3
	tci-miR-276-3p	tetur15g01900	3
	tci-miR-276-5p	tetur10g00240	3
	tci-miR-276-5p	tetur10g02590	3
	tci-miR-276-5p	tetur11g03970	3
	tci-miR-276-5p	tetur109g00010	3
	tci-miR-276-5p	tetur13g01310	3
	tci-miR-276-5p	tetur11g04420	3
	tci-miR-276-5p	tetur15g02040	3
	tci-miR-276-5p	tetur10g01080	3
	tci-miR-276-5p	tetur10g01350	3
	tci-miR-276-5p	tetur13g02520	3
	tci-miR-276-5p	tetur11g03300	3
	tci-miR-276-5p	tetur13g03420	3
	tci-miR-276-5p	tetur148g00040	3
	tci-miR-276-5p	tetur10g04500	3
	tci-miR-276-5p	tetur10g03520	3
	tci-miR-276-5p	tetur01g12280	3
	tci-miR-276-5p	tetur11g03700	3
	tci-miR-276-5p	tetur15g01840	3
	tci-miR-276-5p	tetur33g00330	3
	tci-miR-276-5p	tetur09g02070	3
	tci-miR-276-5p	tetur26g01620	3
	tci-miR-278-3p	tetur15g01840	3
	tci-miR-278-3p	tetur10g04720	3
	tci-miR-278-3p	tetur10g04600	3
	tci-miR-278-3p	tetur28g00580	3
	tci-miR-278-3p	tetur10g01150	3
	tci-miR-278-3p	tetur10g00260	3
	tci-miR-278-3p	tetur10g02350	3
	tci-miR-278-3p	tetur18g01620	3
	tci-miR-278-3p	tetur10g05794	3
	tci-miR-278-3p	tetur05g08070	3
	tci-miR-278-3p	tetur10g00270	3
	tci-miR-278-3p	tetur10g01500	3
	tci-miR-278-3p	tetur10g02710	3
	tci-miR-278-3p	tetur14g00700	3
	tci-miR-278-3p	tetur11g03920	3
	tci-miR-278-3p	tetur26g00260	3
	tci-miR-278-3p	tetur02g14561	3
	tci-miR-278-3p	tetur13g02550	3
	tci-miR-278-3p	tetur31g01390	3
	tci-miR-278-3p	tetur11g00510	3
	tci-miR-278-3p	tetur31g00280	3
	tci-miR-278-5p	tetur13g04240	3
	tci-miR-278-5p	tetur10g00040	3
	tci-miR-278-5p	tetur02g00700	3
	tci-miR-278-5p	tetur10g00980	3
	tci-miR-278-5p	tetur15g04107	3
	tci-miR-279-3p	tetur13g03520	3
	tci-miR-279-3p	tetur10g01080	3
	tci-miR-279-3p	tetur20g01060	3
	tci-miR-279-3p	tetur12g00660	3
	tci-miR-279-3p	tetur02g09280	3
	tci-miR-279-3p	tetur13g03670	3
	tci-miR-279-3p	tetur43g00300	3
	tci-miR-279-5p	tetur10g02590	3
	tci-miR-279-5p	tetur10g03520	3
	tci-miR-279-5p	tetur14g01740	3
	tci-miR-279-5p	tetur01g10220	3
	tci-miR-279-5p	tetur10g00040	3
	tci-miR-279-5p	tetur10g00680	3
	tci-miR-279-5p	tetur10g02940	3
	tci-miR-279-5p	tetur11g03920	3
	tci-miR-279-5p	tetur10g00690	3
	tci-miR-279-5p	tetur32g00510	3
	tci-miR-279-5p	tetur01g09730	3
	tci-miR-279-5p	tetur14g03020	3
	tci-miR-279-5p	tetur12g00650	3
	tci-miR-279-5p	tetur18g01710	3
	tci-miR-279-5p	tetur11g00590	3
	tci-miR-279-5p	tetur11g04060	3
	tci-miR-281-3p	tetur10g01380	3
	tci-miR-281-3p	tetur10g02350	3
	tci-miR-281-3p	tetur10g02550	3
	tci-miR-281-3p	tetur10g01190	3
	tci-miR-281-3p	tetur02g09280	3
	tci-miR-281-3p	tetur10g02010	3
	tci-miR-281-3p	tetur23g00810	3
	tci-miR-281-3p	tetur10g00520	3
	tci-miR-281-3p	tetur10g00970	3
	tci-miR-281-3p	tetur10g04920	3
	tci-miR-281-3p	tetur13g01170	3
	tci-miR-281-3p	tetur13g01460	3
	tci-miR-281-3p	tetur12g01550	3
	tci-miR-281-3p	tetur20g02740	3
	tci-miR-281-3p	tetur30g01010	3
	tci-miR-281-3p	tetur28g00060	3
	tci-miR-281-3p	tetur10g04990	3
	tci-miR-281-3p	tetur10g04410	3
	tci-miR-281-3p	tetur13g02230	3
	tci-miR-281-3p	tetur10g02780	3
	tci-miR-281-3p	tetur05g06490	3
	tci-miR-281-3p	tetur22g02290	3
	tci-miR-281-3p	tetur02g03510	3
	tci-miR-281-3p	tetur19g00790	3
	tci-miR-281-5p	tetur10g01690	3
	tci-miR-281-5p	tetur10g04840	3
	tci-miR-281-5p	tetur10g04260	3
	tci-miR-281-5p	tetur10g02420	3
	tci-miR-281-5p	tetur10g01620	3
	tci-miR-281-5p	tetur01g12300	3
	tci-miR-281-5p	tetur14g01030	3
	tci-miR-281-5p	tetur11g02000	3
	tci-miR-281-5p	tetur01g16080	3
	tci-miR-281-5p	tetur12g00800	3
	tci-miR-281-5p	tetur20g02910	3
	tci-miR-281-5p	tetur02g02360	3
	tci-miR-281-5p	tetur01g04570	3
	tci-miR-305-3p	tetur10g00690	3
	tci-miR-305-3p	tetur14g01020	3
	tci-miR-305-3p	tetur16g02270	3
	tci-miR-305-3p	tetur10g03450	3
	tci-miR-305-3p	tetur19g01100	3
	tci-miR-305-3p	tetur10g04220	3
	tci-miR-305-3p	tetur22g02560	3
	tci-miR-305-5p	tetur10g02590	3
	tci-miR-305-5p	tetur10g04600	3
	tci-miR-305-5p	tetur13g03520	3
	tci-miR-305-5p	tetur10g00370	3
	tci-miR-305-5p	tetur17g02610	3
	tci-miR-305-5p	tetur14g00380	3
	tci-miR-305-5p	tetur10g01620	3
	tci-miR-305-5p	tetur20g02540	3
	tci-miR-305-5p	tetur10g00740	3
	tci-miR-305-5p	tetur26g02220	3
	tci-miR-305-5p	tetur14g00650	3
	tci-miR-305-5p	tetur13g02870	3
	tci-miR-305-5p	tetur10g02800	3
	tci-miR-305-5p	tetur19g02240	3
	tci-miR-305-5p	tetur01g09330	3
	tci-miR-305-5p	tetur27g00600	3
	tci-miR-305-5p	tetur10g00870	3
	tci-miR-305-5p	tetur27g01280	3
	tci-miR-305-5p	tetur33g00570	3
	tci-miR-305-5p	tetur01g13760	3
	tci-miR-307-3p	tetur13g01310	3
	tci-miR-317-3p	tetur14g01020	3
	tci-miR-317-3p	tetur11g02400	3
	tci-miR-317-3p	tetur10g02540	3
	tci-miR-317-3p	tetur10g01370	3
	tci-miR-317-3p	tetur23g01250	3
	tci-miR-317-3p	tetur15g02140	3
	tci-miR-317-3p	tetur01g13580	3
	tci-miR-317-3p	tetur10g00260	3
	tci-miR-317-3p	tetur02g00420	3
	tci-miR-317-3p	tetur10g03850	3
	tci-miR-317-3p	tetur10g02310	3
	tci-miR-317-3p	tetur14g03510	3
	tci-miR-317-3p	tetur10g01940	3
	tci-miR-317-3p	tetur10g00390	3
	tci-miR-317-3p	tetur10g01960	3
	tci-miR-317-3p	tetur13g00640	3
	tci-miR-317-3p	tetur11g04940	3
	tci-miR-317-3p	tetur19g01200	3
	tci-miR-317-3p	tetur11g01470	3
	tci-miR-317-3p	tetur10g04050	3
	tci-miR-317-3p	tetur17g03490	3
	tci-miR-317-3p	tetur02g08180	3
	tci-miR-317-3p	tetur23g01870	3
	tci-miR-317-3p	tetur15g02370	3
	tci-miR-317-3p	tetur20g01180	3
	tci-miR-317-3p	tetur17g03480	3
	tci-miR-317-3p	tetur02g13060	3
	tci-miR-317-3p	tetur09g01480	3
	tci-miR-317-5p	tetur10g00260	3
	tci-miR-317-5p	tetur13g02710	3
	tci-miR-317-5p	tetur13g00790	3
	tci-miR-317-5p	tetur14g01740	3
	tci-miR-317-5p	tetur02g09680	3
	tci-miR-317-5p	tetur10g00640	3
	tci-miR-317-5p	tetur13g03630	3
	tci-miR-317-5p	tetur10g05130	3
	tci-miR-317-5p	tetur10g00680	3
	tci-miR-317-5p	tetur27g01110	3
	tci-miR-317-5p	tetur13g02430	3
	tci-miR-317-5p	tetur22g01790	3
	tci-miR-317-5p	tetur31g00420	3
	tci-miR-317-5p	tetur32g00930	3
	tci-miR-317-5p	tetur03g03900	3
	tci-miR-34-3p	tetur10g00680	3
	tci-miR-34-3p	tetur10g01350	3
	tci-miR-34-3p	tetur11g01500	3
	tci-miR-34-3p	tetur11g06170	3
	tci-miR-34-3p	tetur10g00510	3
	tci-miR-34-3p	tetur10g01190	3
	tci-miR-34-3p	tetur16g02550	3
	tci-miR-34-3p	tetur01g06620	3
	tci-miR-34-3p	tetur11g03980	3
	tci-miR-34-3p	tetur11g03090	3
	tci-miR-34-3p	tetur10g02820	3
[truncated: 11,062 more rows]
